# Supplementary material for: Aromas: Lovely to Smell and Nice Solvents for Polyphenols? Curcumin Solubilisation Power of Fragrances and Flavours
Source: MDPI journal article supplement (doi:10.3390/molecules29020294), 2024-01-05
Supplement: s1 [file s1]

## Supplementary Information

# Aromas: Lovely to Smell and Nice Solvents for Polyphenols? Curcumin Solubilisation Power of Fragrances and Flavours †

Michael Schmidt <sup>1\*</sup>, Verena Huber <sup>2</sup>, Didier Touraud <sup>2</sup> and Werner Kunz <sup>2,\*</sup>

<sup>1</sup> Institute of Materials Resource Management, University of Augsburg, Am Technologiezentrum 8, D-86159 Augsburg, Germany

<sup>2</sup> Institute of Physical and Theoretical Chemistry, University of Regensburg, D-93040 Regensburg, Germany; verena1.huber@chemie.uni-regensburg.de (V.H.); didier.touraud@chemie.uni-regensburg.de (D.T.)

\* Correspondence: michael1.schmidt@uni-a.de (M.S.); werner.kunz@chemie.uni-regensburg.de (W.K.)

† This paper is dedicated to Farid Chemat, an outstanding scientist, colleague, and friend. Rest in peace, cher ami.

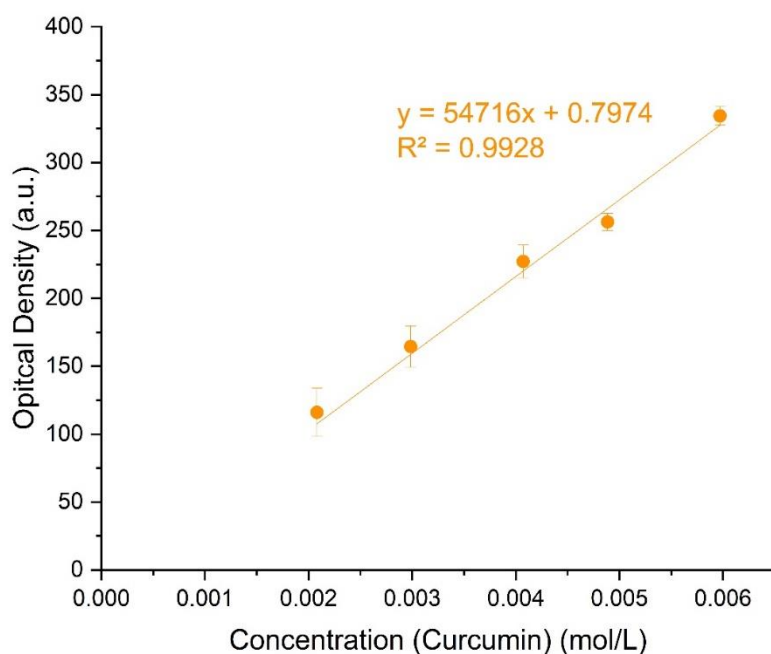

**Figure S 1** Calibration curve of curcumin in ethanol at  $\lambda=425$  nm.

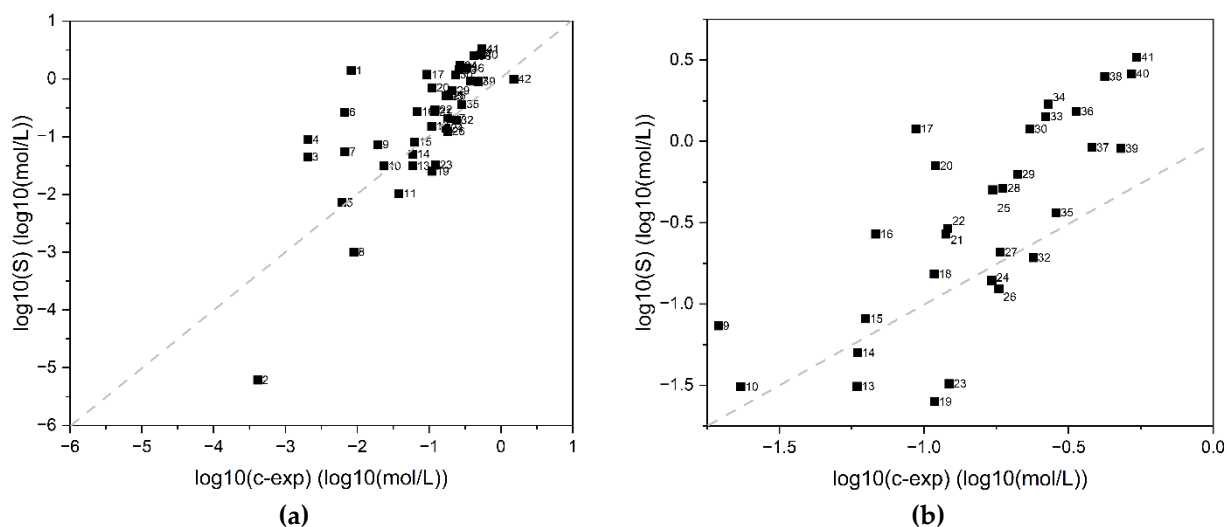

**Figure S 2** Calculated solubility of curcumin  $\log_{10}(S)$  vs the logarithmic curcumin concentration  $c(x)$  in the respective liquid solvents, (a) showing the whole graph, while (b) shows the section between  $-2 < \log_{10}(c(x)) < 0$  for better identification of the datapoints. The numbering of labels refers to the list in Table 1. Vanillin and veratraldehyde are excluded due to being solid compounds.

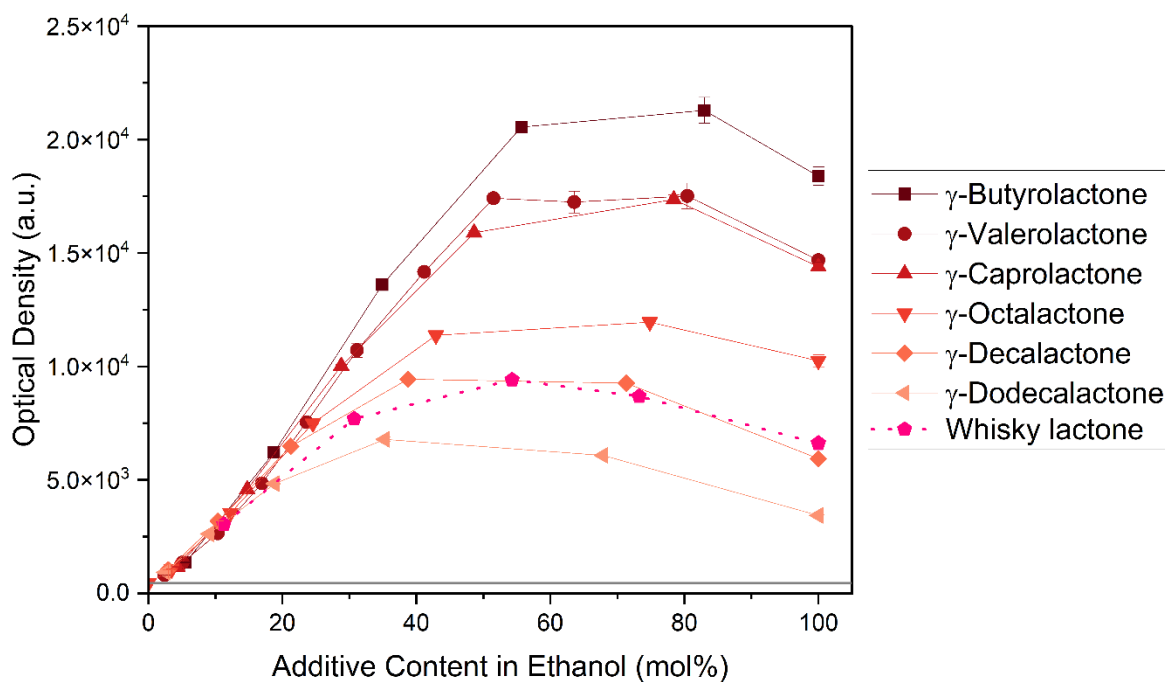

**Figure S 3** Optical densities in arbitrary units (a.u.) of curcumin in binary ethanolic mixtures with  $\gamma$ -lactones.

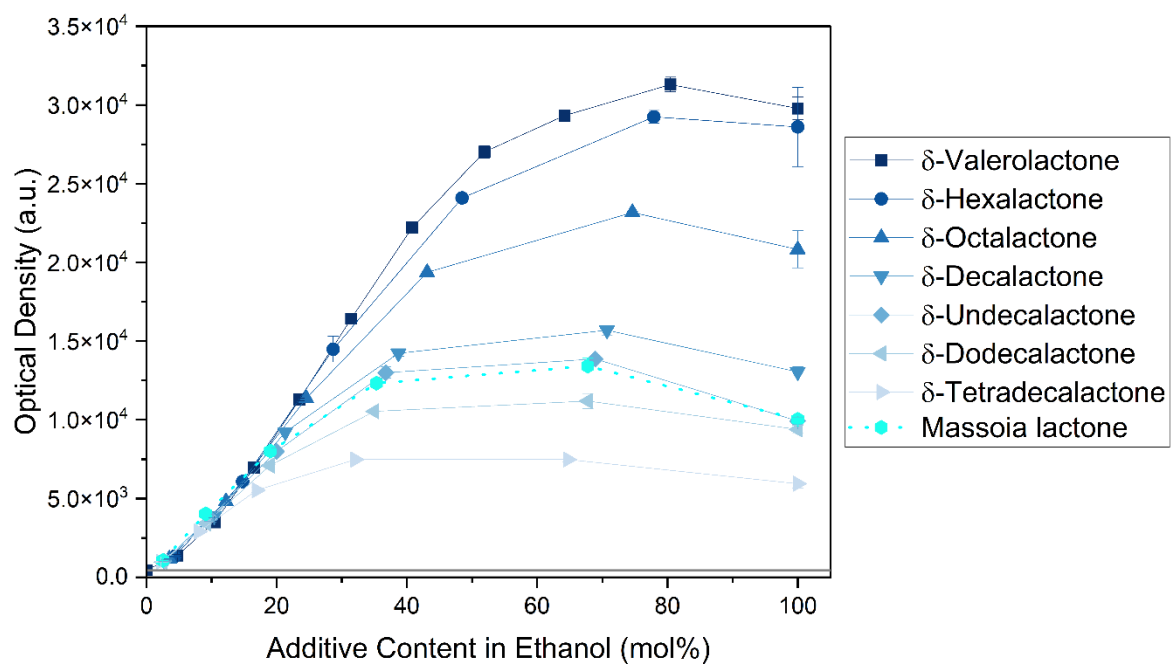

**Figure S 4** Optical densities in arbitrary units (a.u.) of curcumin in binary ethanolic mixtures with  $\delta$ -lactones.

(a)

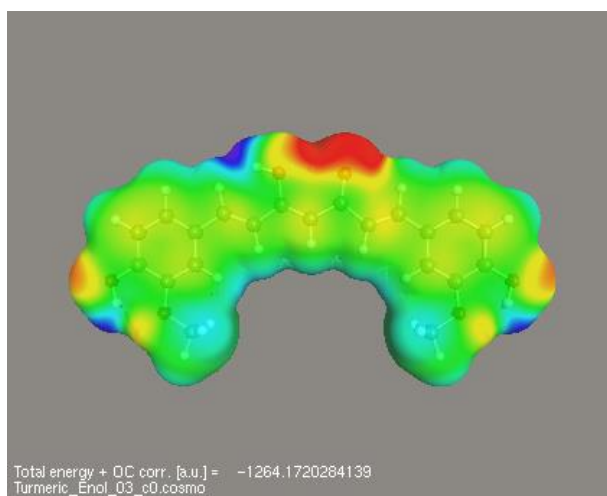

(b)

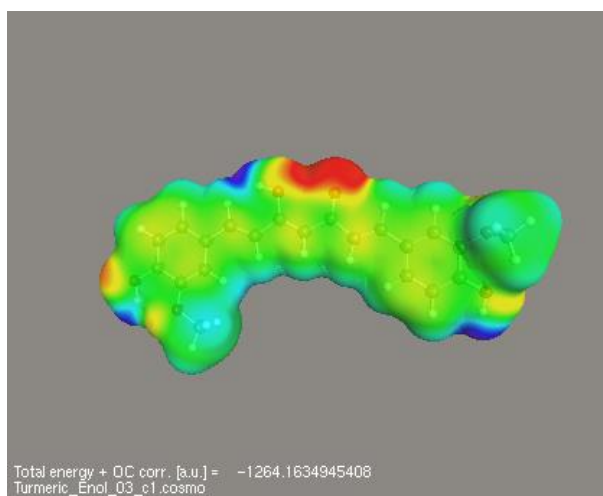

(c)

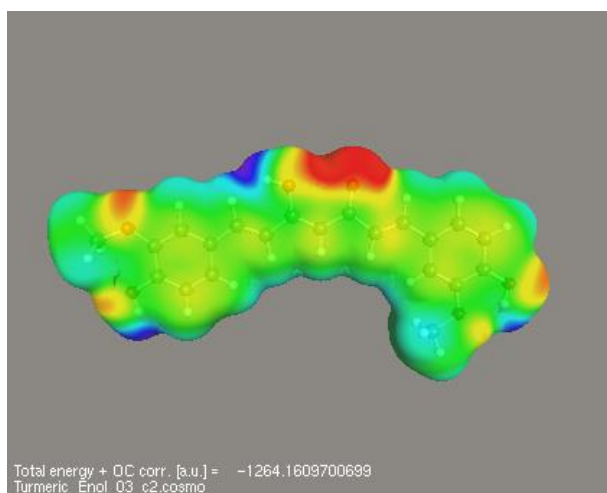

(d)

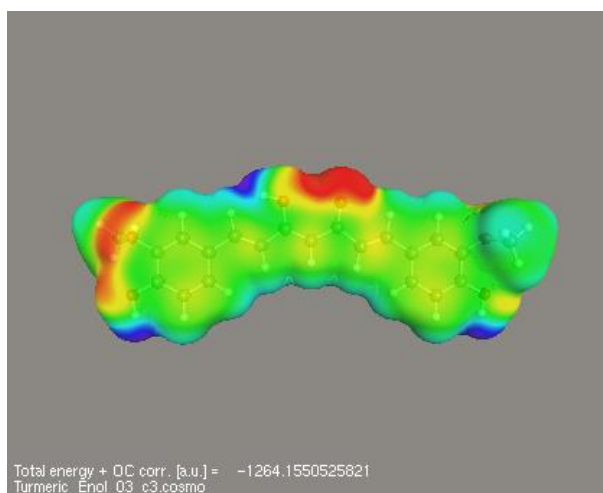

**Figure S 5** COSMO surfaces of the four keto-enol conformers of curcumin, (a) conformer 1, (b) conformer 2, (c) conformer 3, and (d) conformer 4.

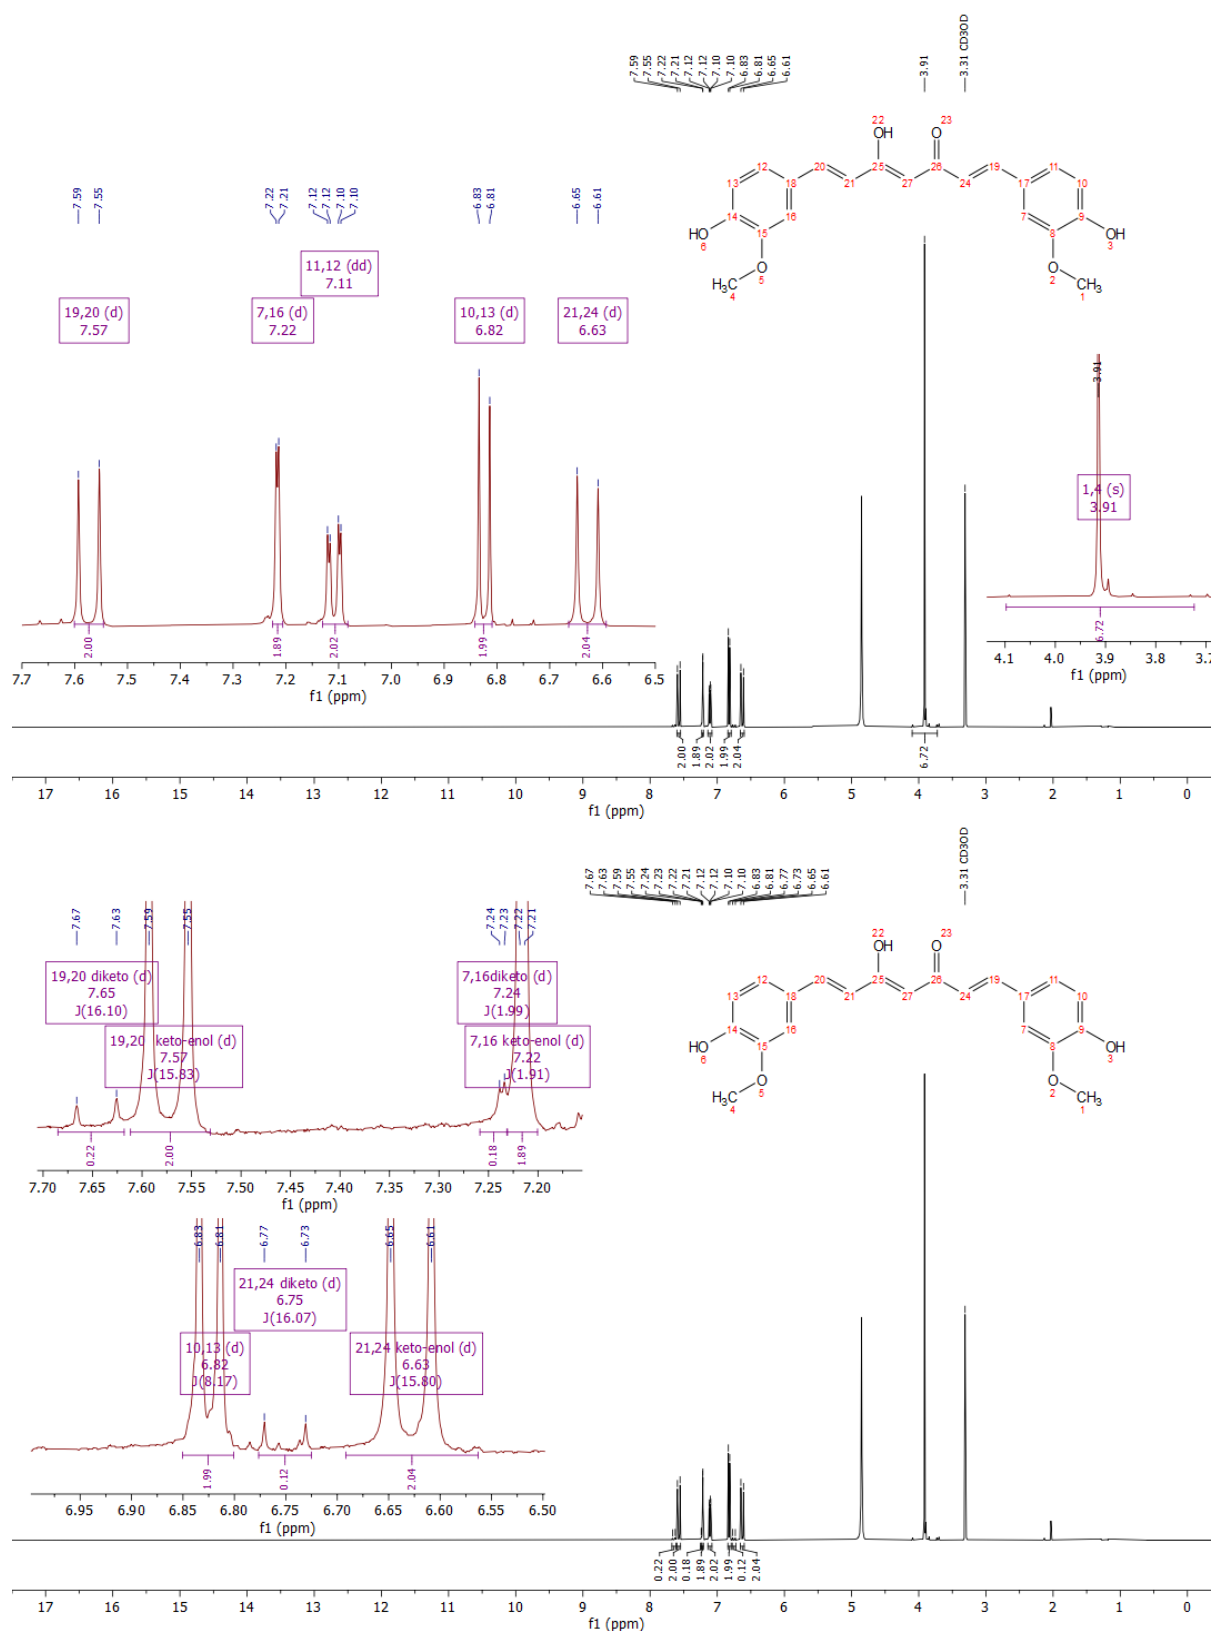

**Figure S 6** <sup>1</sup>H-NMR spectrum of curcumin in methanol-d<sub>4</sub> with assigned signals to the predominant conformer of curcumin (top) and of diketo/keto-enol groups of curcumin (bottom).

Signals of curcumin:  $\delta$  H (400 MHz, methanol-d<sub>4</sub>) 3.91 (7 H, s), 6.63 (2 H, d, J 15.8), 6.82 (2 H, d, J 8.2), 7.11 (2 H, dd, J 8.2, 1.9), 7.22 (2 H, d, J 1.9), 7.57 (2 H, d, J 15.8).

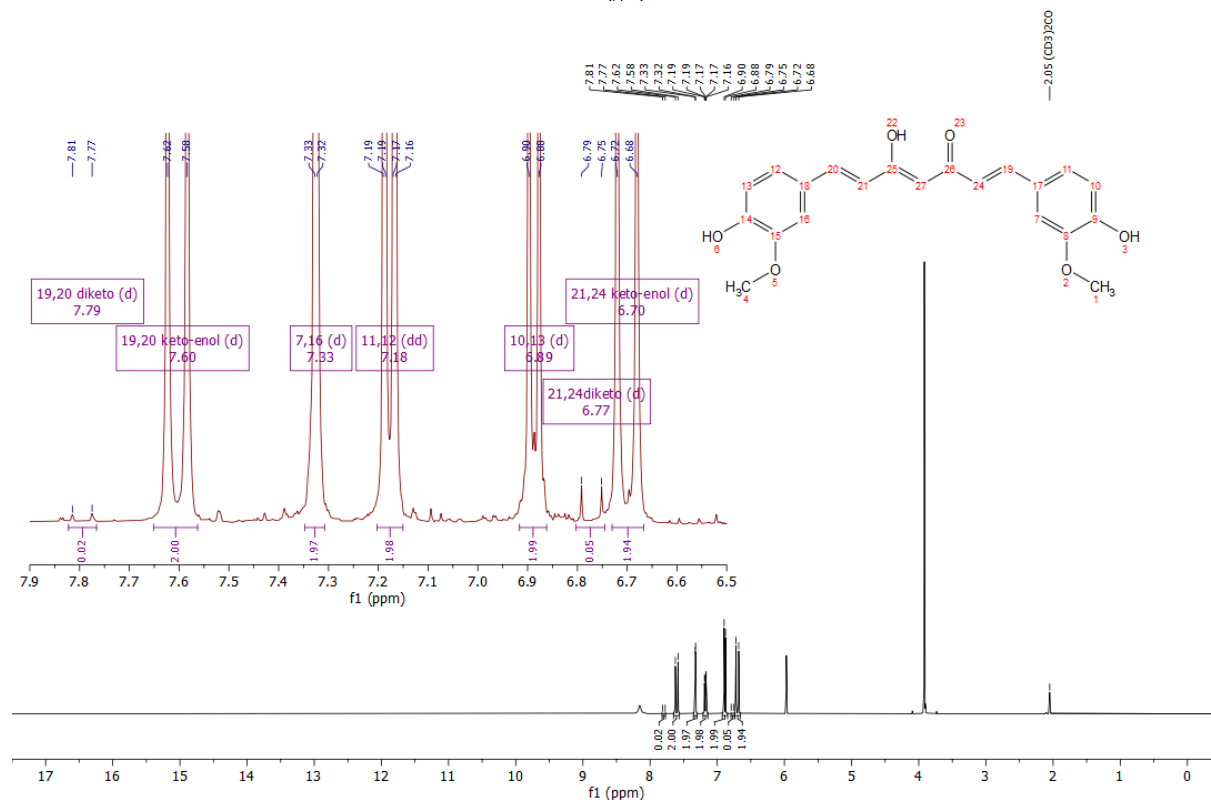

Signals of curcumin:  $\delta_{\text{H}}$  (400 MHz, acetone- $d_6$ ) 3.92 (6 H, s), 5.97 (1 H, s), 6.70 (2 H, d,  $J$  15.8), 6.89 (2 H, d,  $J$  8.2), 7.14 – 7.21 (2 H, m), 7.33 (2 H, d,  $J$  1.9), 7.60 (2 H, d,  $J$  15.8), 8.15 (2 H, s), 16.42 (1 H, s).

Signals of diketo/keto-enol groups of curcumin:  $\delta_H$  (400 MHz, acetone- $d_6$ ) 3.92 (6 H, s), 5.97 (1 H, s), 6.70 (2 H, d,  $J$  15.8), 6.77 (0 H, d,  $J$  16.1), 6.89 (2 H, d,  $J$  8.2), 7.18 (2 H, dd,  $J$  8.2, 2.0), 7.33 (2 H, d,  $J$  1.9), 7.60 (2 H, d,  $J$  15.8), 7.79 (0 H, d,  $J$  15.9), 8.15 (2 H, s), 16.42 (1 H, s).

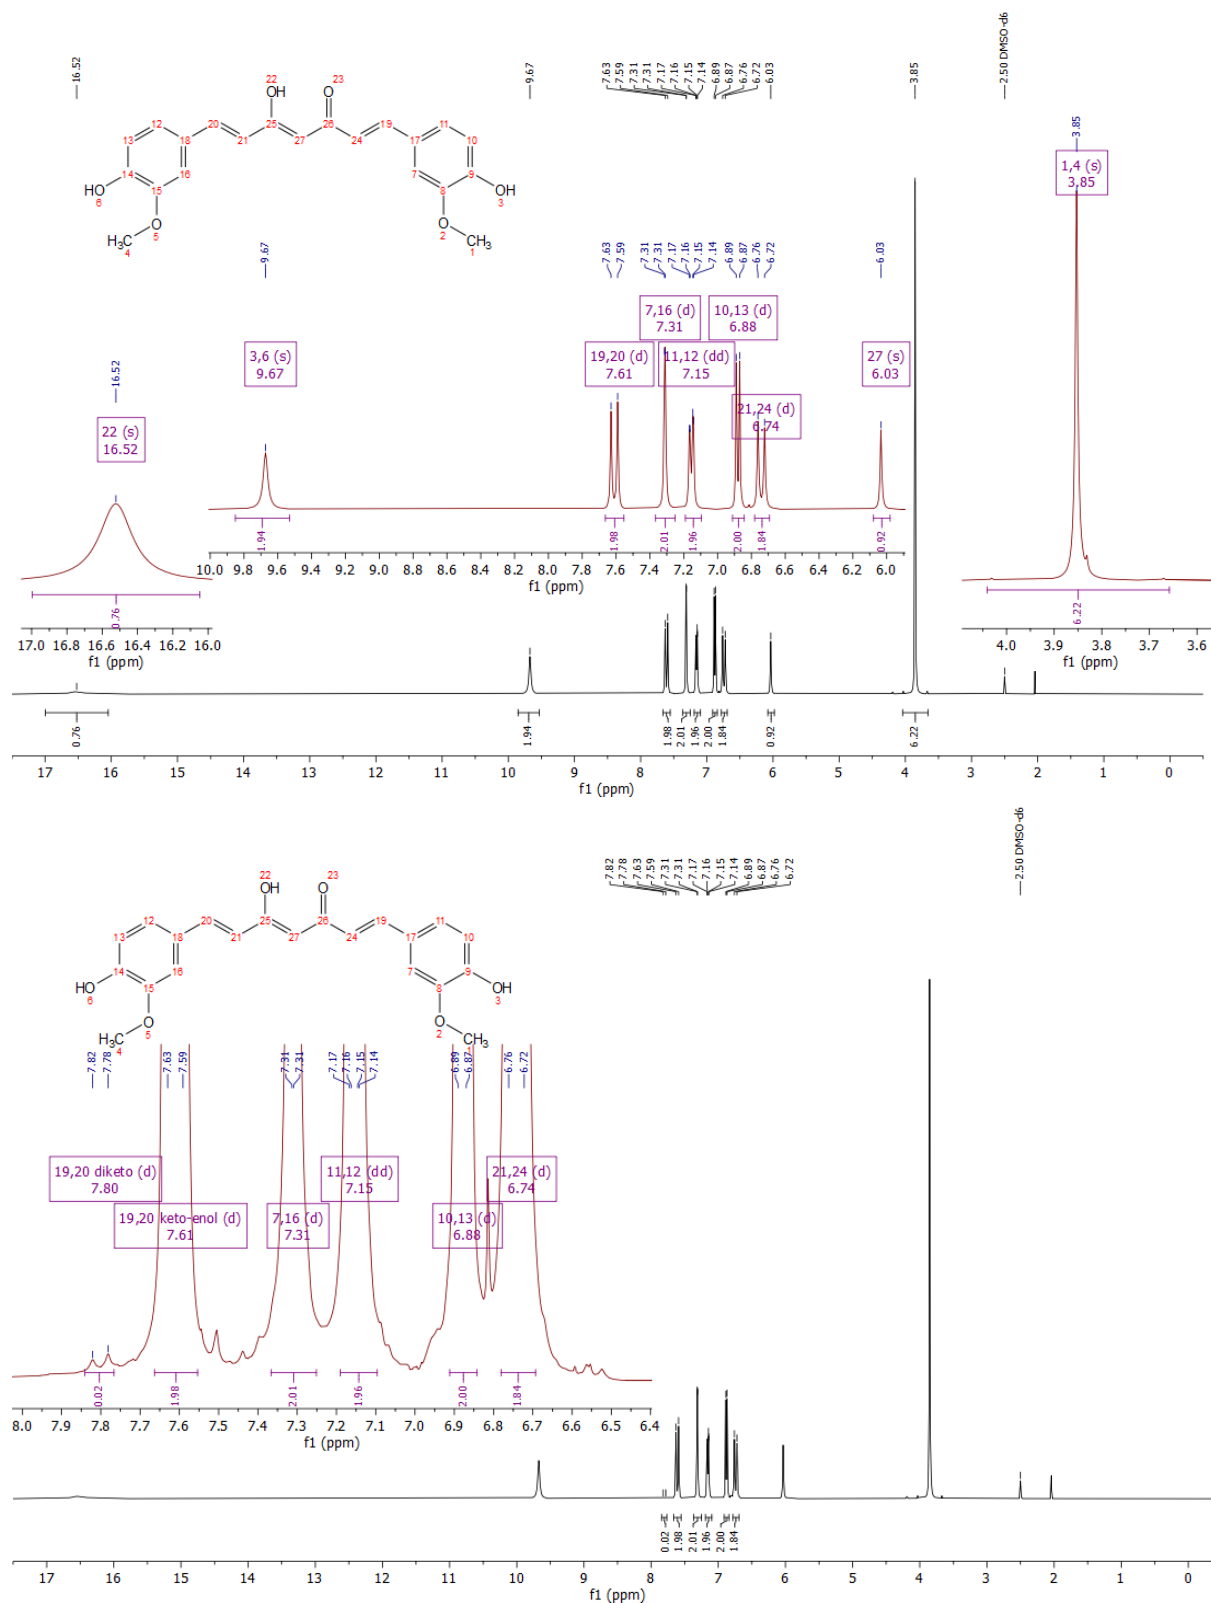

**Figure S 8**  $^1\text{H}$ -NMR spectrum of curcumin in  $\text{DMSO-}d_6$  with assigned signals to the predominant conformer of curcumin (top) and of diketo/keto-enol groups of curcumin (bottom).

Signals of curcumin:  $\delta_{\text{H}}$  (400 MHz, DMSO-d<sub>6</sub>) 3.85 (6 H, s), 6.03 (1 H, s), 6.74 (2 H, d,  $J$  15.7), 6.88 (2 H, d,  $J$  8.1), 7.15 (2 H, dd,  $J$  8.4, 1.8), 7.31 (2 H, d,  $J$  1.9), 7.61 (2 H, d,  $J$  15.6), 9.67 (2 H, s), 16.52 (1 H, s).

Signals of diketo/keto-enol groups of curcumin:  $\delta_{\text{H}}$  (400 MHz, DMSO-d<sub>6</sub>) 6.74 (2 H, d,  $J$  15.7), 6.88 (2 H, d,  $J$  8.1), 7.15 (2 H, dd,  $J$  8.4, 1.8), 7.31 (2 H, d,  $J$  1.9), 7.61 (2 H, d,  $J$  15.6), 7.80 (0 H, d,  $J$  15.7).

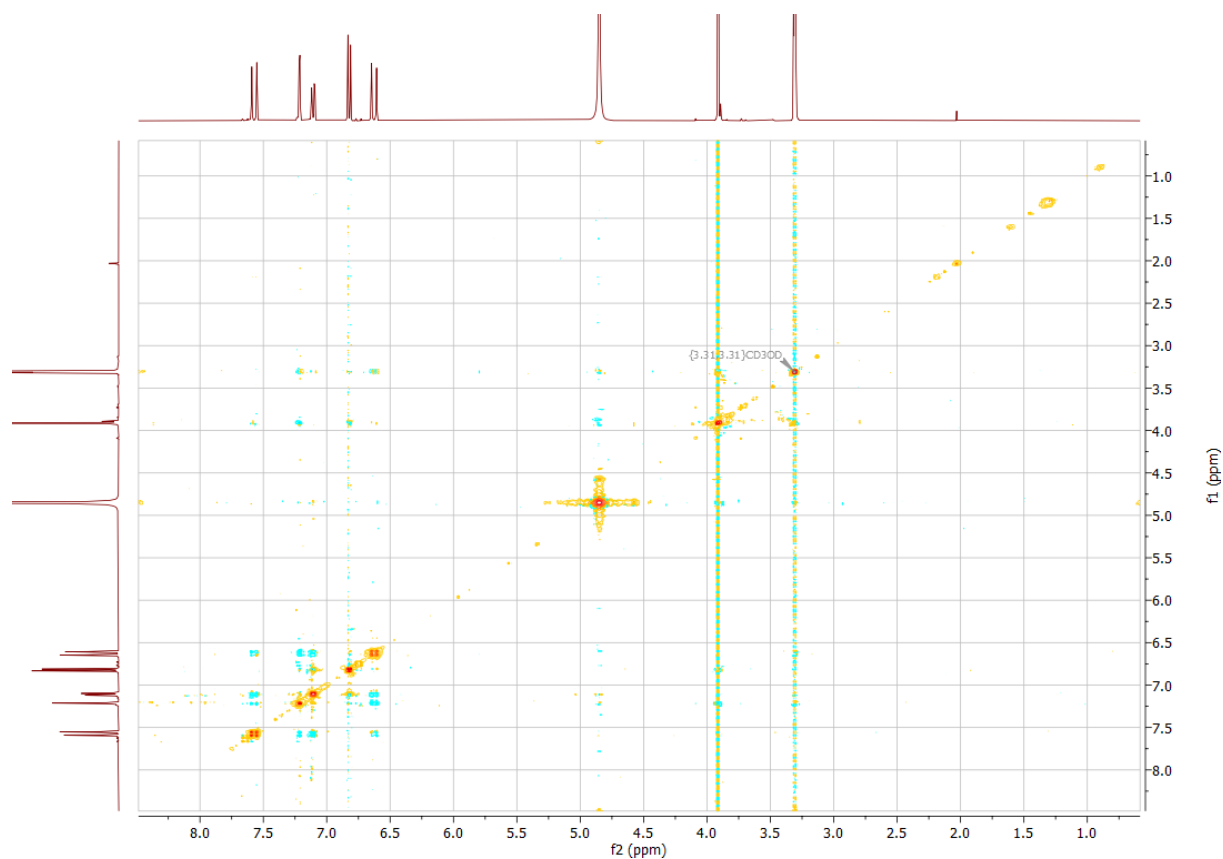

**Figure S 9**  $^1\text{H}$ - $^1\text{H}$  NOESY spectrum of curcumin in methanol-d<sub>4</sub>.

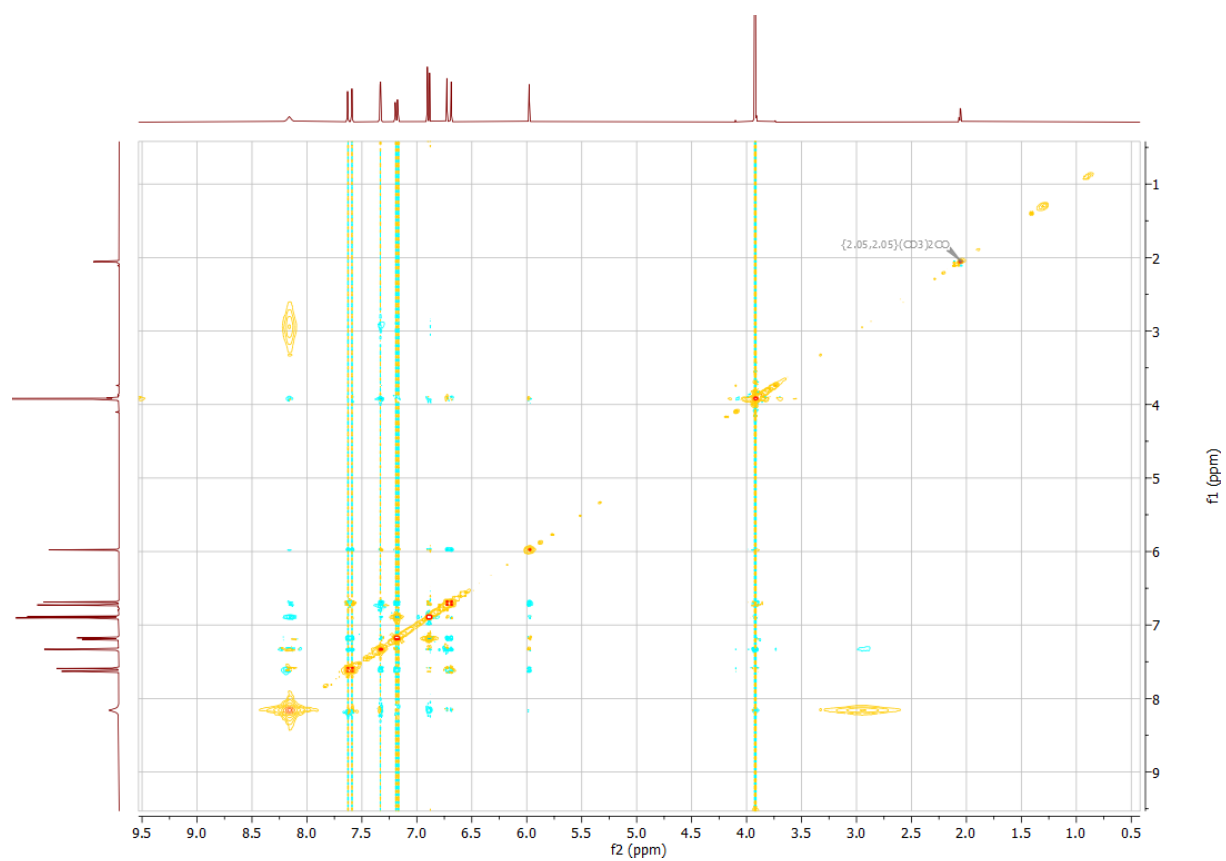

**Figure S 10**  $^1\text{H}$ - $^1\text{H}$  NOESY spectrum of curcumin in acetone- $d_6$ .

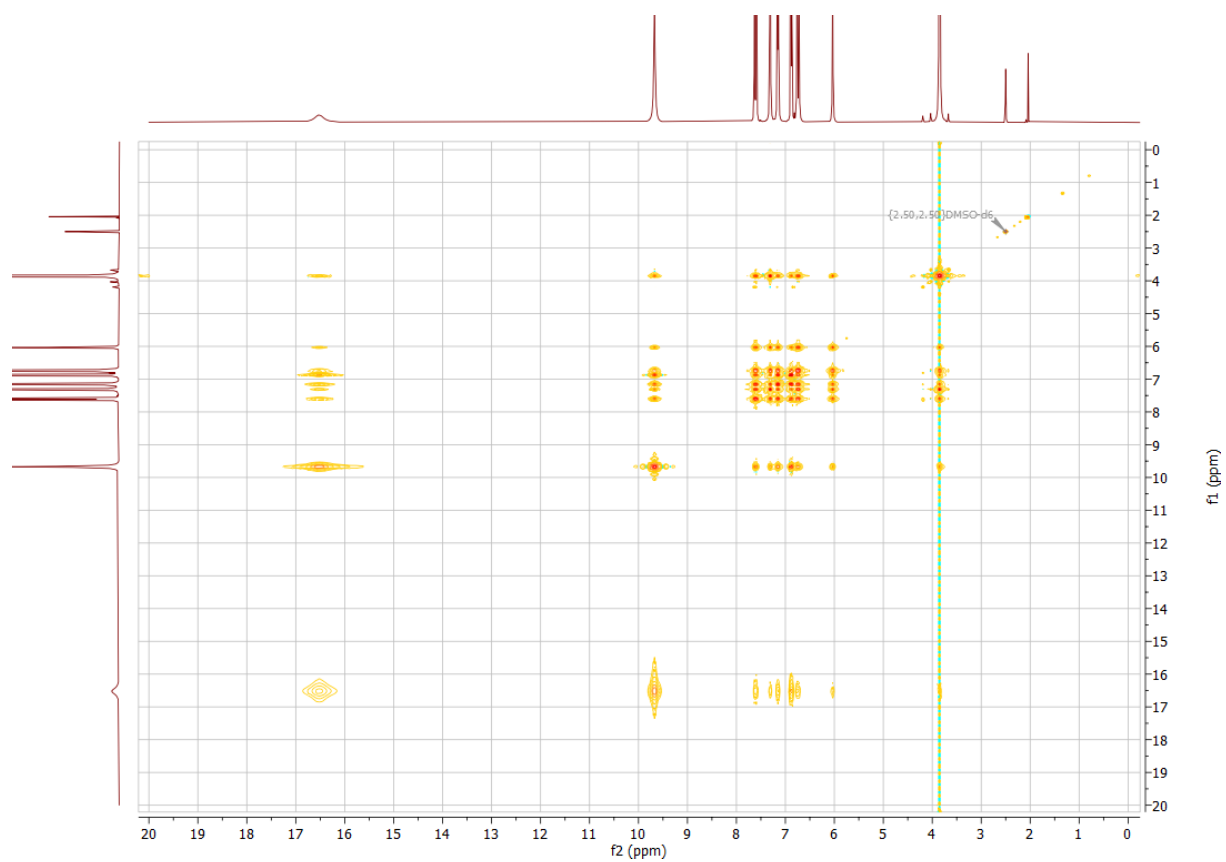

**Figure S 11**  $^1\text{H}$ - $^1\text{H}$  NOESY spectrum of curcumin in DMSO- $d_6$ .



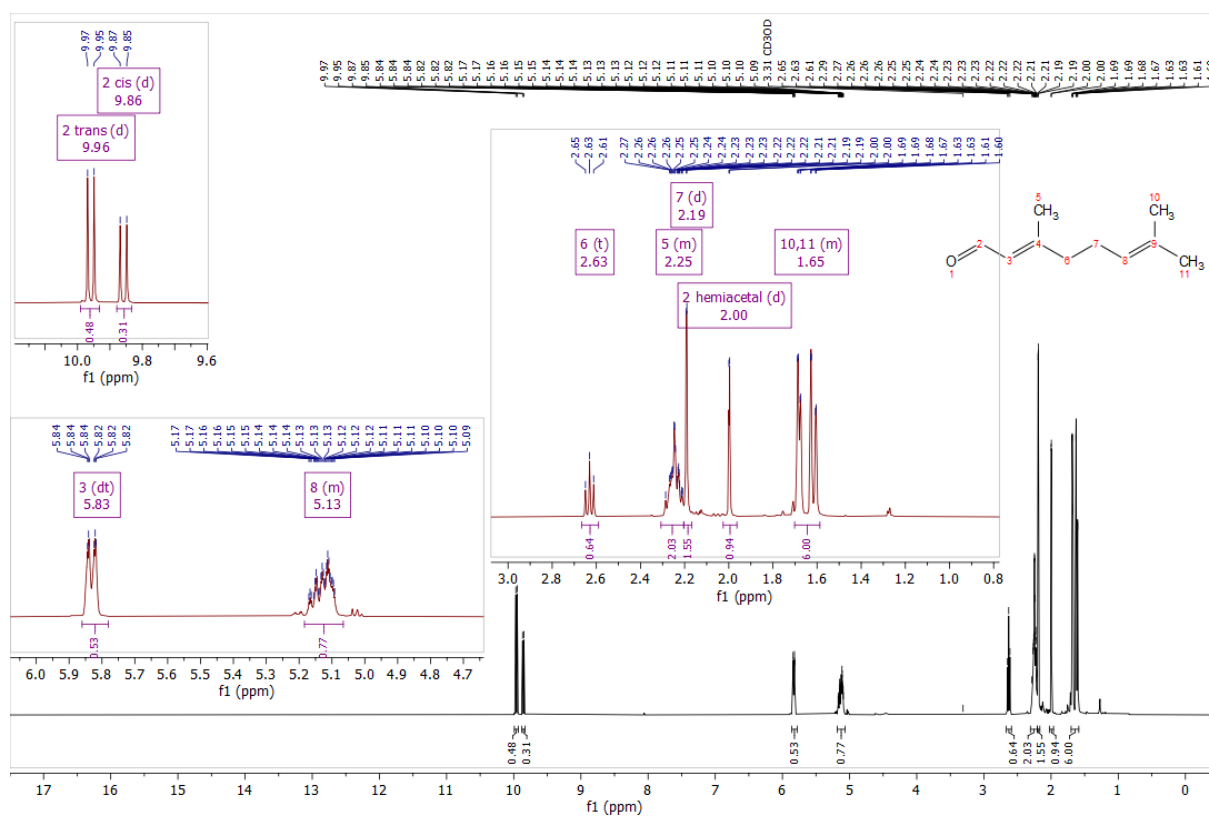

**Figure S 12**  $^1\text{H}$  NMR spectrum of citral in methanol- $d_4$ .

Signals of citral:  $\delta_{\text{H}}$  (400 MHz, methanol- $d_4$ ) 1.59 – 1.70 (6 H, m), 2.00 (1 H, d,  $J$  1.4), 2.19 (2 H, d,  $J$  1.4), 2.20 – 2.31 (2 H, m), 2.63 (1 H, t,  $J$  7.4), 5.07 – 5.18 (1 H, m), 5.83 (1 H, dt,  $J$  8.1, 1.3), 9.86 (0 H, d,  $J$  8.2), 9.96 (0 H, d,  $J$  8.0).

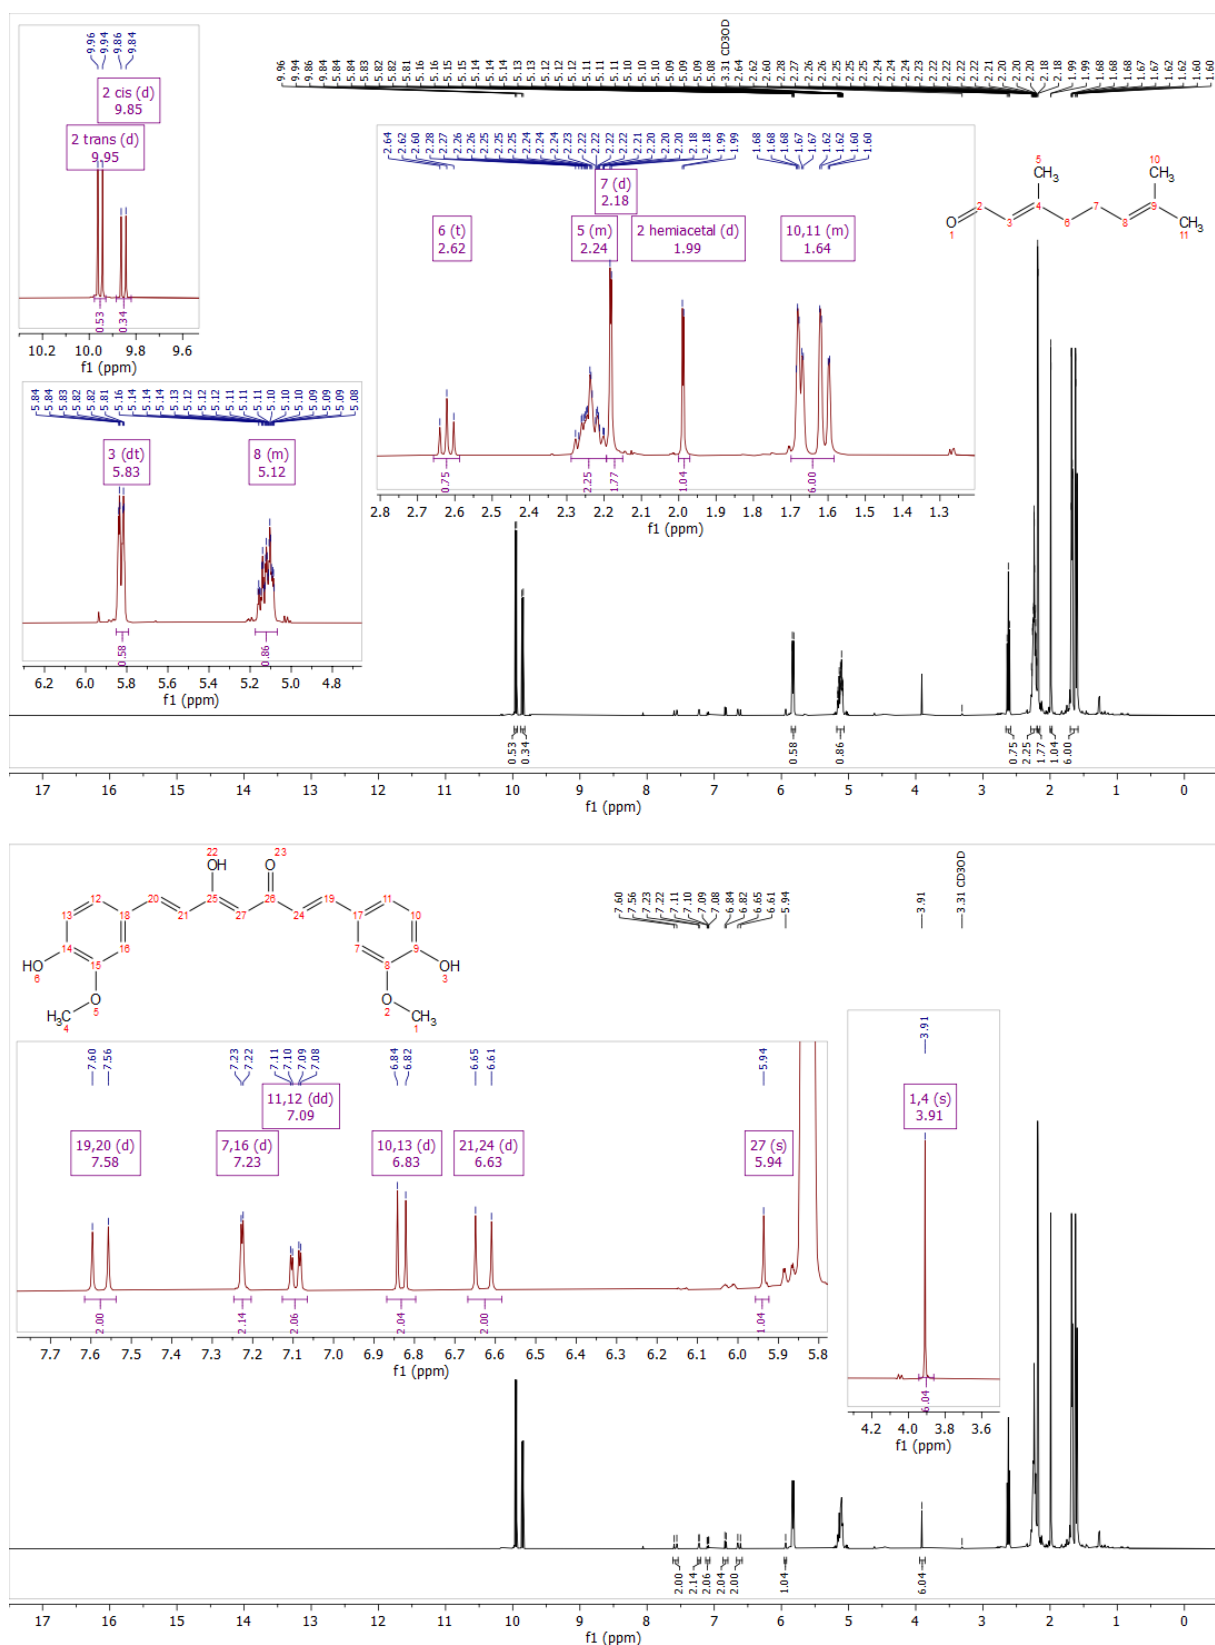

**Figure S 13**  $^1\text{H}$  NMR spectrum of curcumin in citral/methanol- $\text{d}_4$  (30/70) (n/n) with assigned signals of citral (top) and of curcumin (bottom).

Signals of citral:  $\delta_{\text{H}}$  (400 MHz, methanol- $\text{d}_4$ ) 1.58 – 1.70 (6 H, m), 1.99 (1 H, d,  $J$  1.4), 2.18 (2 H, d,  $J$  1.5), 2.19 – 2.29 (2 H, m), 2.62 (1 H, t,  $J$  7.4), 5.07 – 5.17 (1 H, m), 5.83 (1 H, dt,  $J$  8.0, 1.3), 9.85 (0 H, d,  $J$  8.1), 9.95 (1 H, d,  $J$  8.0).

Signals of curcumin:  $\delta_{\text{H}}$  (400 MHz, methanol- $d_4$ ) 3.91 (6 H, s), 5.94 (1 H, s), 6.63 (2 H, d,  $J$  15.8), 6.83 (2 H, d,  $J$  8.2), 7.09 (2 H, dd,  $J$  8.3, 1.9), 7.23 (2 H, d,  $J$  2.0), 7.58 (2 H, d,  $J$  15.7).

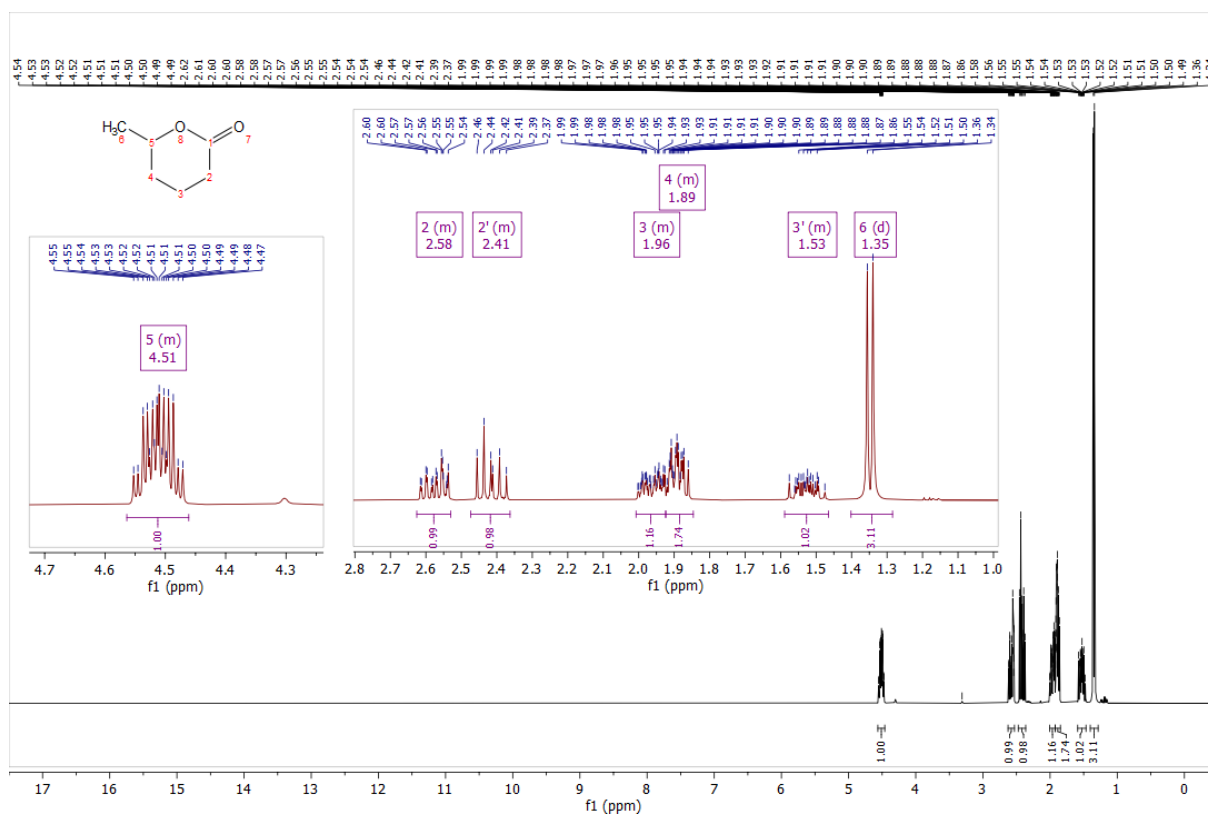

**Figure S 14**  $^1\text{H}$  NMR of delta-hexalactone in methanol- $d_4$ .

$\delta_{\text{H}}$  (400 MHz, methanol- $d_4$ ) 1.35 (3 H, d,  $J$  6.4), 1.47 – 1.59 (1 H, m), 1.85 – 1.92 (2 H, m), 1.92 – 2.01 (1 H, m), 2.36 – 2.47 (1 H, m), 2.53 – 2.63 (1 H, m), 4.46 – 4.56 (1 H, m).



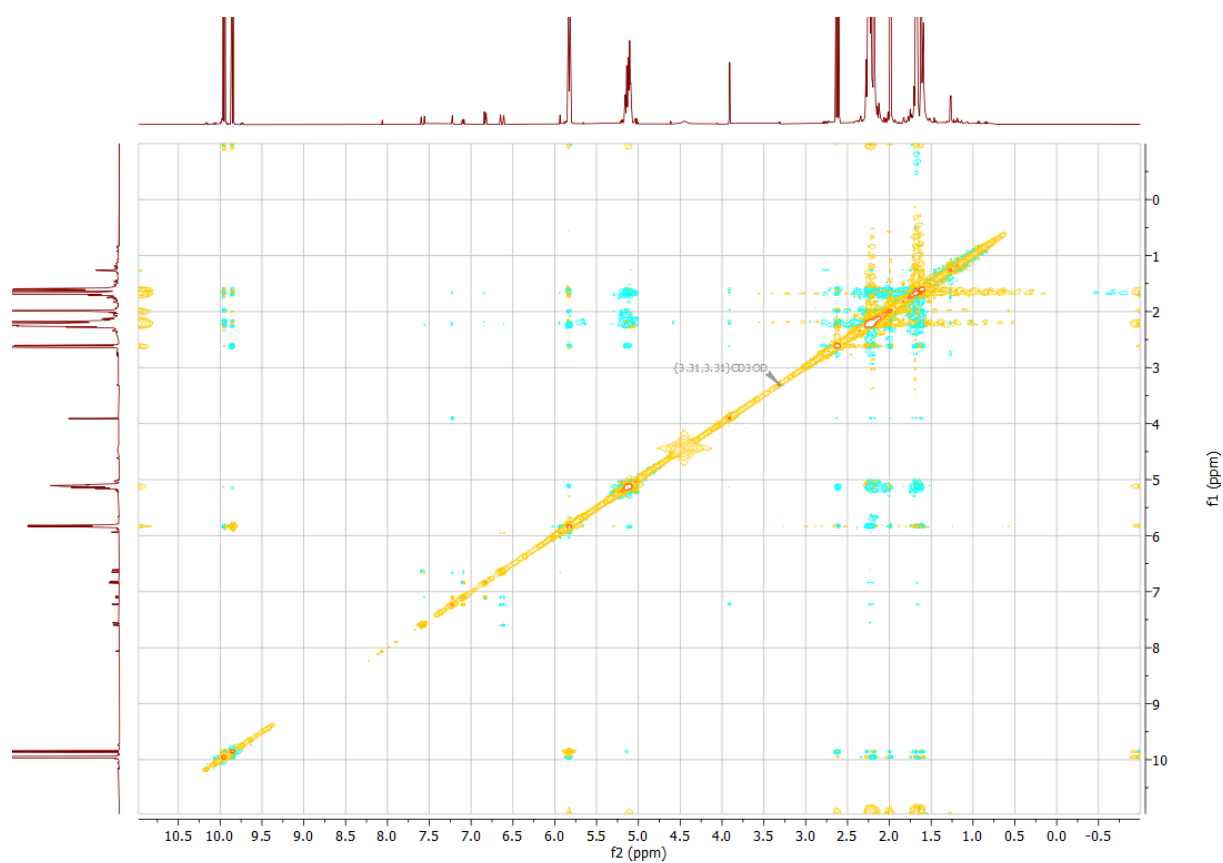

**Figure S 16**  $^1\text{H}$ - $^1\text{H}$  NOESY spectrum of curcumin in citral/methanol- $\text{d}_4$  (30/70) (n/n).

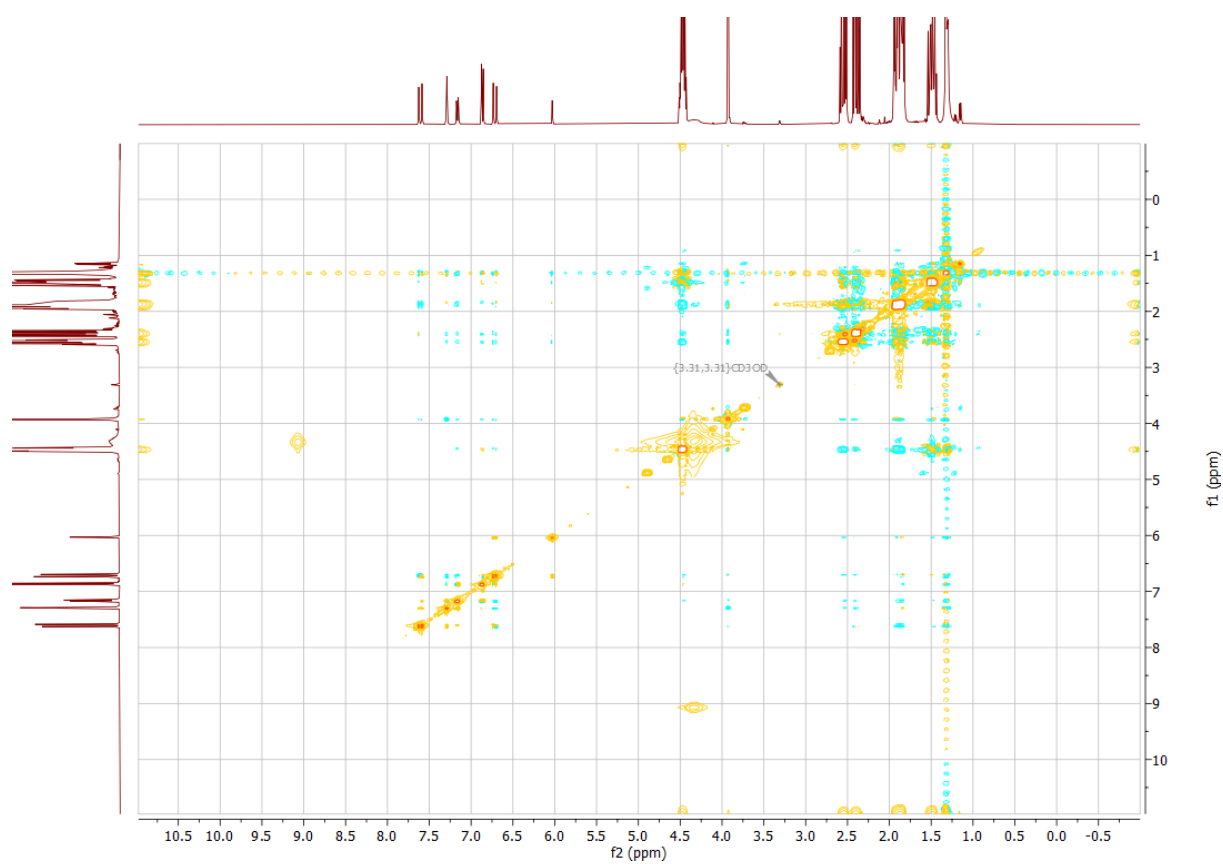

**Figure S 17**  $^1\text{H}$ - $^1\text{H}$  NOESY spectrum of curcumin in delta-hexalactone/methanol- $\text{d}_4$  (30/70) (n/n).
